# Supplementary material
Source: publisher figshare collection journal article supplement (https://gsajournals.figshare.com/ndownloader/files/29157468)
Supplement: Supplementary file 1 [file 29157468]

Table S4. Breeding data from CC-RIX crosses
RIX_CROSS	DAM	SIRE	NF	NM	N	RIX_SR	DAM_SR	SIRE_SR	DAM_SR_N	SIRE_SR_N	DATA_SOURCE
CC051xCC001	CC051	CC001	13	21	34	0.382352941	0.497222222	0.455075846	1800	1715	Repo
CC001xCC001	CC001	CC001	780	935	1715	0.454810496	0.454810496	0.454810496	1715	1715	InbredCross
CC012xCC002	CC012	CC002	10	12	22	0.454545455	0.470010341	0.481365378	1934	2871	CUBE
CC024xCC002	CC024	CC002	55	43	98	0.56122449	0.505376344	0.481365378	93	2871	CUBE
CC030xCC002	CC030	CC002	28	20	48	0.583333333	0.647058824	0.481365378	17	2871	CUBE
CC002xCC002	CC002	CC002	1382	1489	2871	0.481365378	0.481365378	0.481365378	2871	2871	InbredCross
CC006xCC003	CC006	CC003	9	9	18	0.5	0.467799	0.415041783	1413	359	Repo
CC003xCC003	CC003	CC003	149	210	359	0.415041783	0.415041783	0.415041783	359	359	InbredCross
CC001xCC005	CC001	CC005	3	3	6	0.5	0.455075846	0.509476031	1714	897	CUBE
CC005xCC005	CC005	CC005	457	440	897	0.509476031	0.50947603	0.50947603	897	897	InbredCross
CC011xCC005	CC011	CC005	37	29	66	0.560606061	0.537815126	0.509476031	476	897	CUBE
CC041xCC009	CC041	CC009	5	18	23	0.217391304	0.522326675	0.42578125	1702	768	Repo
CC042xCC009	CC042	CC009	16	19	35	0.457142857	0.532296651	0.42578125	836	768	Repo
CC009xCC009	CC009	CC009	327	441	768	0.42578125	0.42578125	0.42578125	768	768	InbredCross
CC005xCC011	CC005	CC011	7	7	14	0.5	0.509476031	0.537815126	897	476	CUBE
CC027xCC011	CC027	CC011	22	15	37	0.594594595	0.494559842	0.537815126	1011	476	CUBE
CC043xCC011	CC043	CC011	28	28	56	0.5	0.430263158	0.537815126	760	476	CUBE
CC011xCC011	CC011	CC011	256	220	476	0.537815126	0.537815126	0.537815126	476	476	InbredCross
CC011xCC013	CC011	CC013	34	26	60	0.566666667	0.5378151	0.5461847	476	747	Repo
CC041xCC013	CC041	CC013	35	34	69	0.507246377	0.522326675	0.5461847	1702	747	Repo
CC013xCC013	CC013	CC013	408	339	747	0.546184739	0.546184739	0.546184739	747	747	InbredCross
CC051xCC019	CC051	CC019	17	20	37	0.459459459	0.497222222	0.514546966	1800	1203	CUBE
CC019xCC019	CC019	CC019	619	584	1203	0.514546966	0.514546966	0.514546966	1203	1203	InbredCross
CC002xCC024	CC002	CC024	13	5	18	0.722222222	0.481365378	0.505376344	2871	93	CUBE
CC011xCC024	CC011	CC024	20	14	34	0.588235294	0.5378151	0.505376344	476	93	Repo
CC037xCC024	CC037	CC024	23	28	51	0.450980392	0.523197716	0.505376344	1401	93	Repo
CC024xCC024	CC024	CC024	47	46	93	0.505376344	0.505376344	0.505376344	93	93	InbredCross
CC002xCC027	CC002	CC027	1	14	15	0.066666667	0.4813654	0.494559842	2871	1011	Repo
CC011xCC027	CC011	CC027	56	47	103	0.54368932	0.537815126	0.494559842	476	1011	CUBE
CC037xCC027	CC037	CC027	30	16	46	0.652173913	0.523197716	0.494559842	1401	1011	Repo
CC027xCC027	CC027	CC027	500	511	1011	0.494559842	0.494559842	0.494559842	1011	1011	InbredCross
CC011xCC032	CC011	CC032	10	13	23	0.434782609	0.5378151	0.313915858	476	927	Repo
CC068xCC032	CC068	CC032	3	10	13	0.230769231	0.463	0.313915858	1000	927	Repo
CC032xCC032	CC032	CC032	291	636	927	0.313915858	0.313915858	0.313915858	927	927	InbredCross
CC019xCC035	CC019	CC035	14	17	31	0.451612903	0.514546966	0.47030303	1203	825	Repo
CC035xCC035	CC035	CC035	388	437	825	0.47030303	0.47030303	0.47030303	825	825	InbredCross
CC002xCC037	CC002	CC037	18	20	38	0.473684211	0.4813654	0.523197716	2871	1401	Repo
CC037xCC037	CC037	CC037	733	668	1401	0.523197716	0.523197716	0.523197716	1401	1401	InbredCross
CC013xCC040	CC013	CC040	15	26	41	0.365853659	0.5461847	0.455935252	747	1112	Repo
CC025xCC040	CC025	CC040	4	11	15	0.266666667	0.505703422	0.455935252	1578	1112	Repo
CC040xCC040	CC040	CC040	507	605	1112	0.455935252	0.455935252	0.455935252	1112	1112	InbredCross
CC011xCC041	CC011	CC041	18	26	44	0.409090909	0.5378151	0.522326675	476	1702	Repo
CC041xCC041	CC041	CC041	889	813	1702	0.522326675	0.522326675	0.522326675	1702	1702	InbredCross
CC001xCC042	CC001	CC042	19	13	32	0.59375	0.455075846	0.532296651	1714	836	CUBE
CC005xCC042	CC005	CC042	8	19	27	0.296296296	0.509476	0.532296651	897	836	Repo
CC019xCC042	CC019	CC042	0	2	2	0	0.514546966	0.532296651	1203	836	CUBE
CC042xCC042	CC042	CC042	445	391	836	0.532296651	0.532296651	0.532296651	836	836	InbredCross
CC002xCC043	CC002	CC043	22	22	44	0.5	0.481365378	0.430263158	2871	760	CUBE
CC43xCC043	CC043	CC043	327	433	760	0.430263158	0.430263158	0.430263158	760	760	InbredCross
CC010xCC051	CC010	CC051	10	10	20	0.5	0.4986911	0.497222222	1528	1800	Repo
CC051xCC051	CC051	CC051	895	905	1800	0.497222222	0.497222222	0.497222222	1800	1800	InbredCross
CC051xCC059	CC051	CC059	13	10	23	0.565217391	0.497222222	0.521551724	1800	1856	CUBE
CC059xCC059	CC059	CC059	968	888	1856	0.521551724	0.521551724	0.521551724	1856	1856	InbredCross
CC041xCC060	CC041	CC060	3	18	21	0.142857143	0.522326675	0.428436911	1702	1062	Repo
CC042xCC060	CC042	CC060	12	9	21	0.571428571	0.532296651	0.428436911	836	1062	Repo
CC060xCC060	CC060	CC060	455	607	1062	0.428436911	0.428436911	0.428436911	1062	1062	InbredCross
CC025xCC061	CC025	CC061	7	6	13	0.538461538	0.505703422	0.488759367	1578	1201	Repo
CC061xCC061	CC061	CC061	587	614	1201	0.488759367	0.488759367	0.488759367	1201	1201	InbredCross
CC002xCC068	CC002	CC068	6	10	16	0.375	0.4813654	0.463	2871	1000	Repo
CC025xCC068	CC025	CC068	4	9	13	0.307692308	0.505703422	0.463	1578	1000	Repo
CC068xCC068	CC068	CC068	463	537	1000	0.463	0.463	0.463	1000	1000	InbredCross
CC025xCC074	CC025	CC074	8	11	19	0.421052632	0.505703422	0.465753425	1578	73	Repo
CC040xCC074	CC040	CC074	12	9	21	0.571428571	0.455935252	0.465753425	1112	73	Repo
CC074xCC074	CC074	CC074	34	39	73	0.465753425	0.465753425	0.465753425	73	73	InbredCross
CC002xCC075	CC002	CC075	28	29	57	0.49122807	0.481365378	0.497942387	2871	486	CUBE
CC019xCC075	CC019	CC075	5	3	8	0.625	0.514546966	0.497942387	1203	486	CUBE
CC075xCC075	CC075	CC075	242	244	486	0.497942387	0.497942387	0.497942387	486	486	InbredCross
